# Supplementary material
Source: publisher figshare collection journal article supplement (https://acs.figshare.com/ndownloader/files/4233415)
Supplement: Supplementary file 1 [file 4233415]

78
 Energy =   -1802.9879425540
 C    2.0805900    5.3177655   -1.0400826
 C    0.7866683    5.6476897   -0.6674376
 C    0.0442882    6.6103350   -1.4342033
 C    0.6874178    7.2400127   -2.5556334
 C    2.0207583    6.8758858   -2.8952615
 C    2.6970169    5.9254762   -2.1592781
 N    0.1925429    5.0130611    0.4680116
 C    0.1323188    3.5960205    0.4915613
 C    0.4642477    2.8577145    1.6431370
 C    0.4045092    1.4648179    1.6378188
 C    0.0282487    0.7411549    0.4886422
 C   -0.2903580    1.4919638   -0.6611354
 C   -0.2465905    2.8844316   -0.6627769
 C   -0.0282487   -0.7411549    0.4886422
 C   -0.4045091   -1.4648179    1.6378188
 C   -0.4642477   -2.8577145    1.6431370
 C   -0.1323188   -3.5960205    0.4915613
 C    0.2465905   -2.8844316   -0.6627769
 C    0.2903580   -1.4919638   -0.6611354
 N   -0.1925429   -5.0130611    0.4680116
 C   -0.7866683   -5.6476897   -0.6674376
 C   -0.0442882   -6.6103350   -1.4342033
 C   -0.6874178   -7.2400127   -2.5556334
 C   -2.0207583   -6.8758858   -2.8952615
 C   -2.6970169   -5.9254762   -2.1592781
 C   -2.0805900   -5.3177655   -1.0400826
 C    0.1239896   -5.7850705    1.6140978
 C   -0.6009668   -6.9527926    1.9181831
 C   -0.2637642   -7.7280565    3.0311448
 C    0.7893395   -7.3531236    3.8707722
 C    1.5122345   -6.1908236    3.5746796
 C    1.1935351   -5.4183381    2.4571130
 C   -0.1239896    5.7850705    1.6140978
 C    0.6009668    6.9527926    1.9181831
 C    0.2637642    7.7280565    3.0311448
 C   -0.7893395    7.3531236    3.8707722
 C   -1.5122345    6.1908236    3.5746796
 C   -1.1935351    5.4183381    2.4571130
 H   -0.6986700   -0.9252043    2.5431326
 H    0.6986700    0.9252043    2.5431326
 H   -0.7853922   -3.3806284    2.5473624
 H    0.7853922    3.3806284    2.5473624
 H    0.5210061   -3.4350992   -1.5663501
 H   -0.5210061    3.4350992   -1.5663501
 H   -2.4973571   -7.3576312   -3.7551594
 H    2.4973571    7.3576312   -3.7551594
 H   -3.7208850   -5.6448941   -2.4259738
 H    3.7208850    5.6448941   -2.4259738
 H   -2.6283125   -4.5773941   -0.4507640
 H    2.6283125    4.5773941   -0.4507640
 H    1.7779202   -4.5235622    2.2280467
 H   -1.7779202    4.5235622    2.2280467
 H    2.3471170   -5.8860597    4.2145989
 H   -2.3471170    5.8860597    4.2145989
 H    1.0470635   -7.9598212    4.7442019
 H   -1.0470635    7.9598212    4.7442019
 H   -0.8420785   -8.6327174    3.2465366
 H    0.8420785    8.6327174    3.2465366
 H   -1.4335142   -7.2525054    1.2772869
 H    1.4335142    7.2525054    1.2772869
 H    0.6180931   -0.9769464   -1.5691093
 H   -0.6180931    0.9769464   -1.5691093
 C   -1.3078318    6.9515039   -1.1461050
 C   -1.9844300    7.8809886   -1.9106552
 C   -1.3430560    8.5195025   -3.0020013
 C   -0.0383499    8.2011740   -3.3161337
 H   -1.8122501    6.4636016   -0.3100188
 H   -3.0247995    8.1259250   -1.6739564
 H   -1.8882055    9.2590774   -3.5972573
 H    0.4605454    8.6815502   -4.1645078
 C    1.3078318   -6.9515039   -1.1461050
 C    1.9844300   -7.8809886   -1.9106552
 C    1.3430560   -8.5195025   -3.0020013
 C    0.0383499   -8.2011740   -3.3161337
 H    1.8122501   -6.4636016   -0.3100188
 H    3.0247995   -8.1259250   -1.6739564
 H    1.8882055   -9.2590774   -3.5972573
 H   -0.4605454   -8.6815502   -4.1645078
